# Supplementary material for: Changes in the Progression of Chronic Kidney Disease in Patients Undergoing Fecal Microbiota Transplantation
Source: MDPI journal article supplement (doi:10.3390/nu16081109), 2024-04-10
Supplement: s1 [file s1]

**Supplementary Table S1.** Evolution of biochemical parameters of CKD patients from the FMT group and the placebo group

| <b>Days after treatment</b>  | <b>FMT (n= 15)</b><br>Mean (SD) | <b>Placebo (n= 13)</b><br>Mean (SD) | <b>p value</b> |
|------------------------------|---------------------------------|-------------------------------------|----------------|
| <b>Hemoglobin, g/dL</b>      |                                 |                                     |                |
| Day 10                       | 11.02 (± 1.98)                  | 11.33 (± 1.82)                      | 0.67           |
| Day 30                       | 10.98 (± 1.95)                  | 11.42 (± 1.91)                      | 0.55           |
| Day 60                       | 10.91 (± 1.73)                  | 11.50 (± 1.95)                      | 0.41           |
| Day 90                       | 11.25 (± 1.30)                  | 11.56 (± 1.86)                      | 0.60           |
| Day 120                      | 11.32 (± 1.32)                  | 11.92 (± 1.65)                      | 0.31           |
| Day 180                      | 11.41 (± 1.83)                  | 11.58 (± 1.64)                      | 0.80           |
| p value                      | 0.91                            | 0.40                                |                |
| <b>Leukocytes, K/uL</b>      |                                 |                                     |                |
| Day 10                       | 8.22 (± 1.41)                   | 6.89 (± 1.46)                       | <b>0.02</b>    |
| Day 30                       | 8.46 (± 1.93)                   | 6.72 (± 1.24)                       | <b>0.01</b>    |
| Day 60                       | 8.67 (± 1.83)                   | 7.17 (± 2.28)                       | 0.06           |
| Day 90                       | 8.09 (± 1.55)                   | 7.19 (± 1.56)                       | 0.15           |
| Day 120                      | 8.26 (± 1.92)                   | 6.74 (± 1.49)                       | <b>0.03</b>    |
| Day 180                      | 8.65 (± 2.23)                   | 7.23 (± 1.30)                       | 0.05           |
| p value                      | 0.72                            | 0.63                                |                |
| <b>Platelets, K/uL</b>       |                                 |                                     |                |
| Day 10                       | 222.64 (± 82.13)                | 201.62 (± 43.02)                    | 0.41           |
| Day 30                       | 235.80 (± 81.78)                | 210.77 (± 51.19)                    | 0.35           |
| Day 60                       | 223.07 (± 94.85)                | 201.77 (± 39.73)                    | 0.45           |
| Day 90                       | 224.46 (± 62.31)                | 205.31 (± 51.70)                    | 0.40           |
| Day 120                      | 218.69 (± 64.25)                | 204.39 (± 40.48)                    | 0.50           |
| Day 180                      | 218.92 (± 68.64)                | 215.00 (± 46.87)                    | 0.86           |
| p value                      | 0.30                            | 0.29                                |                |
| <b>Glucose, mg/dL</b>        |                                 |                                     |                |
| Day 10                       | 111.20 (± 31.04)                | 96.23 (± 18.59)                     | 0.13           |
| Day 30                       | 111.27 (± 34.18)                | 94.54 (± 14.26)                     | 0.10           |
| Day 60                       | 110.13 (± 46.79)                | 108.08 (± 28.43)                    | 0.89           |
| Day 90                       | 123.39 (± 30.71)                | 99.54 (± 26.61)                     | <b>0.04</b>    |
| Day 120                      | 123.23 (± 62.08)                | 119.77 (± 53.43)                    | 0.88           |
| Day 180                      | 127.23 (± 44.71)                | 94.85 (± 13.63)                     | <b>0.02</b>    |
| p value                      | 0.61                            | 0.29                                |                |
| <b>Urine protein, g/24 h</b> |                                 |                                     |                |
| Day 10                       | 1.96 (± 2.44)                   | 1.74 (± 2.17)                       | 0.80           |
| Day 30                       | 2.20 (± 2.40)                   | 1.33 (± 1.74)                       | 0.28           |
| Day 60                       | 2.35 (± 2.55)                   | 1.71 (± 1.95)                       | 0.46           |
| Day 90                       | 2.14 (± 2.02)                   | 1.99 (± 2.17)                       | 0.85           |
| Day 120                      | 2.54 (± 2.25)                   | 1.42 (± 1.32)                       | 0.13           |

|                                     |                 |                 |             |
|-------------------------------------|-----------------|-----------------|-------------|
| Day 180                             | 3.01 (± 2.73)   | 2.34 (± 2.14)   | 0.49        |
| <i>p</i> value                      | 0.44            | 0.27            |             |
| <b>Creatinine clearance, mL/min</b> |                 |                 |             |
| Day 10                              | 35.73 (± 17.17) | 40.92 (± 24.00) | 0.51        |
| Day 30                              | 35.83 (± 20.09) | 40.00 (± 19.36) | 0.58        |
| Day 60                              | 37.40 (± 20.45) | 41.15 (± 21.93) | 0.64        |
| Day 90                              | 40.41 (± 18.90) | 42.15 (± 19.04) | 0.81        |
| Day 120                             | 41.23 (± 20.07) | 46.69 (± 29.01) | 0.58        |
| Day 180                             | 41.23 (± 20.24) | 42.08 (± 25.88) | 0.92        |
| <i>p</i> value                      | 0.25            | 0.44            |             |
| <b>Blood urea nitrogen, mg/dL</b>   |                 |                 |             |
| Day 10                              | 40.93 (± 15.67) | 30.31 (± 9.87)  | <b>0.04</b> |
| Day 30                              | 37.73 (± 13.73) | 30.62 (± 10.62) | 0.13        |
| Day 60                              | 40.40 (± 18.93) | 34.00 (± 14.58) | 0.33        |
| Day 90                              | 36.69 (± 15.77) | 34.62 (± 15.22) | 0.76        |
| Day 120                             | 38.85 (± 18.42) | 32.31 (± 14.12) | 0.32        |
| Day 180                             | 35.00 (± 14.20) | 32.15 (± 11.52) | 0.58        |
| <i>p</i> value                      | 0.51            | 0.52            |             |
| <b>Creatinine, mg/dL</b>            |                 |                 |             |
| Day 10                              | 2.35 (± 0.87)   | 2.13 (± 0.59)   | 0.44        |
| Day 30                              | 2.20 (± 0.80)   | 2.20 (± 0.61)   | 0.99        |
| Day 60                              | 2.41 (± 0.99)   | 2.32 (± 0.74)   | 0.79        |
| Day 90                              | 2.12 (± 0.89)   | 2.22 (± 0.77)   | 0.77        |
| Day 120                             | 2.31 (± 1.21)   | 2.26 (± 0.85)   | 0.91        |
| Day 180                             | 2.34 (± 1.09)   | 2.35 (± 0.91)   | 0.98        |
| <i>p</i> value                      | 0.47            | 0.31            |             |
| <b>Uric acid, mg/dL</b>             |                 |                 |             |
| Day 10                              | 7.09 (± 1.46)   | 6.24 (± 1.63)   | 0.15        |
| Day 30                              | 6.99 (± 1.46)   | 6.59 (± 1.93)   | 0.53        |
| Day 60                              | 7.00 (± 1.65)   | 6.95 (± 1.30)   | 0.93        |
| Day 90                              | 6.92 (± 1.38)   | 6.57 (± 1.46)   | 0.54        |
| Day 120                             | 6.77 (± 1.36)   | 7.13 (± 1.21)   | 0.48        |
| Day 180                             | 6.21 (± 1.04)   | 7.28 (± 1.53)   | <b>0.04</b> |
| <i>p</i> value                      | <b>0.02</b>     | 0.15            |             |
| <b>C-reactive protein, mg/dL</b>    |                 |                 |             |
| Day 10                              | 0.80 (± 0.68)   | 0.51 (± 0.03)   | 0.15        |
| Day 30                              | 0.98 (± 0.91)   | 0.63 (± 0.30)   | 0.20        |
| Day 60                              | 0.99 (± 0.94)   | 1.05 (± 1.94)   | 0.91        |
| Day 90                              | 0.71 (± 0.26)   | 0.62 (± 0.16)   | 0.33        |
| Day 120                             | 0.88 (± 0.49)   | 0.57 (± 0.14)   | <b>0.04</b> |
| Day 180                             | 0.72 (± 0.28)   | 0.56 (± 0.14)   | 0.08        |
| <i>p</i> value                      | 0.17            | 0.38            |             |
| <b>Potassium, mmol/L</b>            |                 |                 |             |

|                               |                |                |              |
|-------------------------------|----------------|----------------|--------------|
| Day 10                        | 4.81 (± 0.64)  | 4.72 (± 0.69)  | 0.72         |
| Day 30                        | 4.99 (± 0.75)  | 4.89 (± 0.68)  | 0.69         |
| Day 60                        | 5.04 (± 0.47)  | 5.15 (± 0.93)  | 0.69         |
| Day 90                        | 5.20 (± 0.60)  | 4.86 (± 0.87)  | 0.26         |
| Day 120                       | 5.02 (± 0.59)  | 4.79 (± 0.61)  | 0.33         |
| Day 180                       | 5.25 (± 0.65)  | 5.08 (± 0.87)  | 0.56         |
| <i>p</i> value                | 0.41           | 0.41           |              |
| <b>Phosphorus, mg/dL</b>      |                |                |              |
| Day 10                        | 4.48 (± 0.57)  | 4.02 (± 0.73)  | 0.07         |
| Day 30                        | 4.25 (± 0.59)  | 4.40 (± 0.90)  | 0.61         |
| Day 60                        | 4.48 (± 0.39)  | 4.39 (± 0.87)  | 0.72         |
| Day 90                        | 4.35 (± 0.72)  | 4.25 (± 0.75)  | 0.73         |
| Day 120                       | 4.26 (± 0.62)  | 4.23 (± 0.81)  | 0.91         |
| Day 180                       | 4.22 (± 0.38)  | 4.39 (± 0.86)  | 0.54         |
| <i>p</i> value                | 0.40           | 0.05           |              |
| <b>HCO<sub>3</sub>, mEq/L</b> |                |                |              |
| Day 10                        | 22.44 (± 4.37) | 24.52 (± 3.00) | 0.16         |
| Day 30                        | 21.97 (± 4.25) | 22.53 (± 3.88) | 0.71         |
| Day 60                        | 20.99 (± 2.55) | 24.46 (± 2.69) | <b>0.002</b> |
| Day 90                        | 20.84 (± 2.84) | 22.20 (± 6.80) | 0.49         |
| Day 120                       | 21.84 (± 4.28) | 24.40 (± 3.04) | 0.09         |
| Day 180                       | 20.85 (± 3.59) | 24.54 (± 3.03) | <b>0.01</b>  |
| <i>p</i> value                | 0.36           | 0.14           |              |

---

SD: standard deviation. Statistically significant differences are remarked in bold letters.
